# Supplementary material
Source: PubMed Central journal article supplement (PMC3016602)

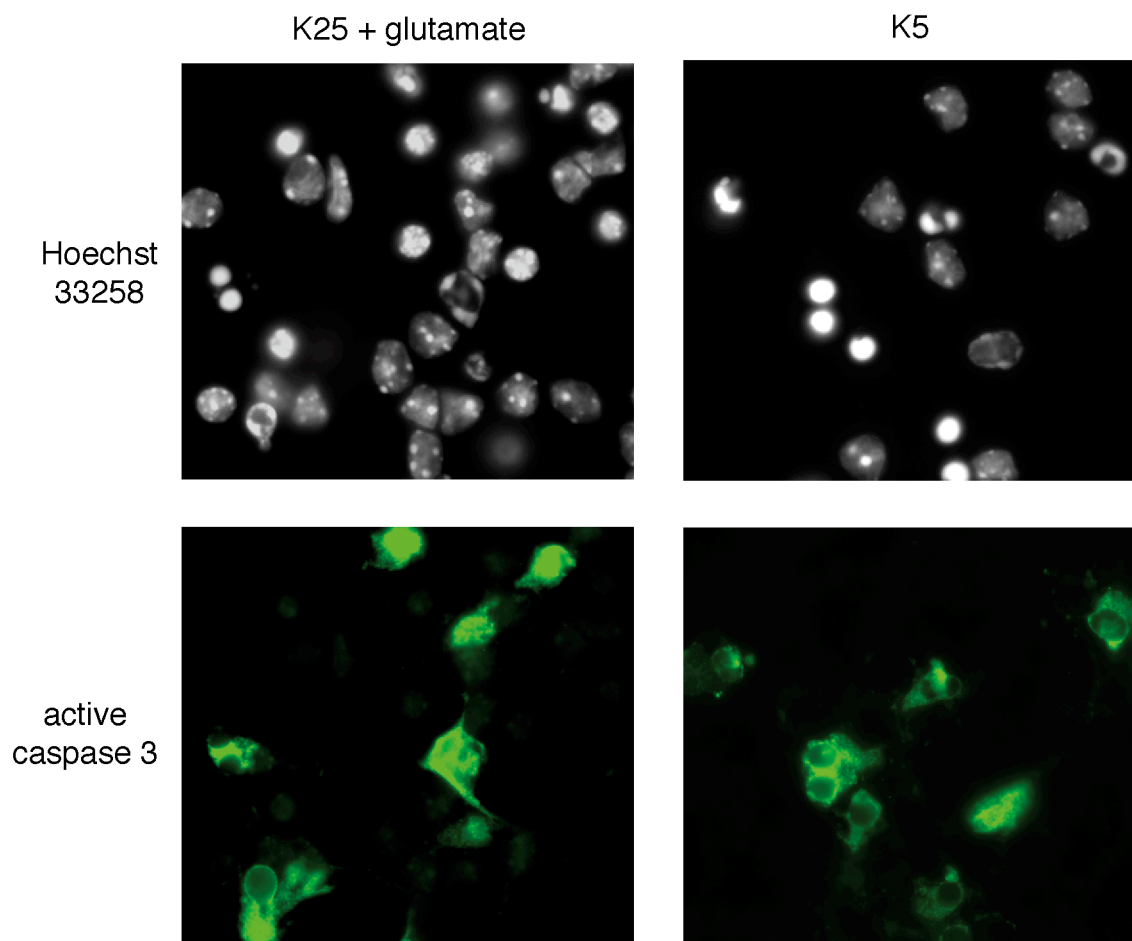

Figure S1

Supplement: NIHMS30631-supplement-2.pdf [file NIHMS30631-supplement-2.pdf]

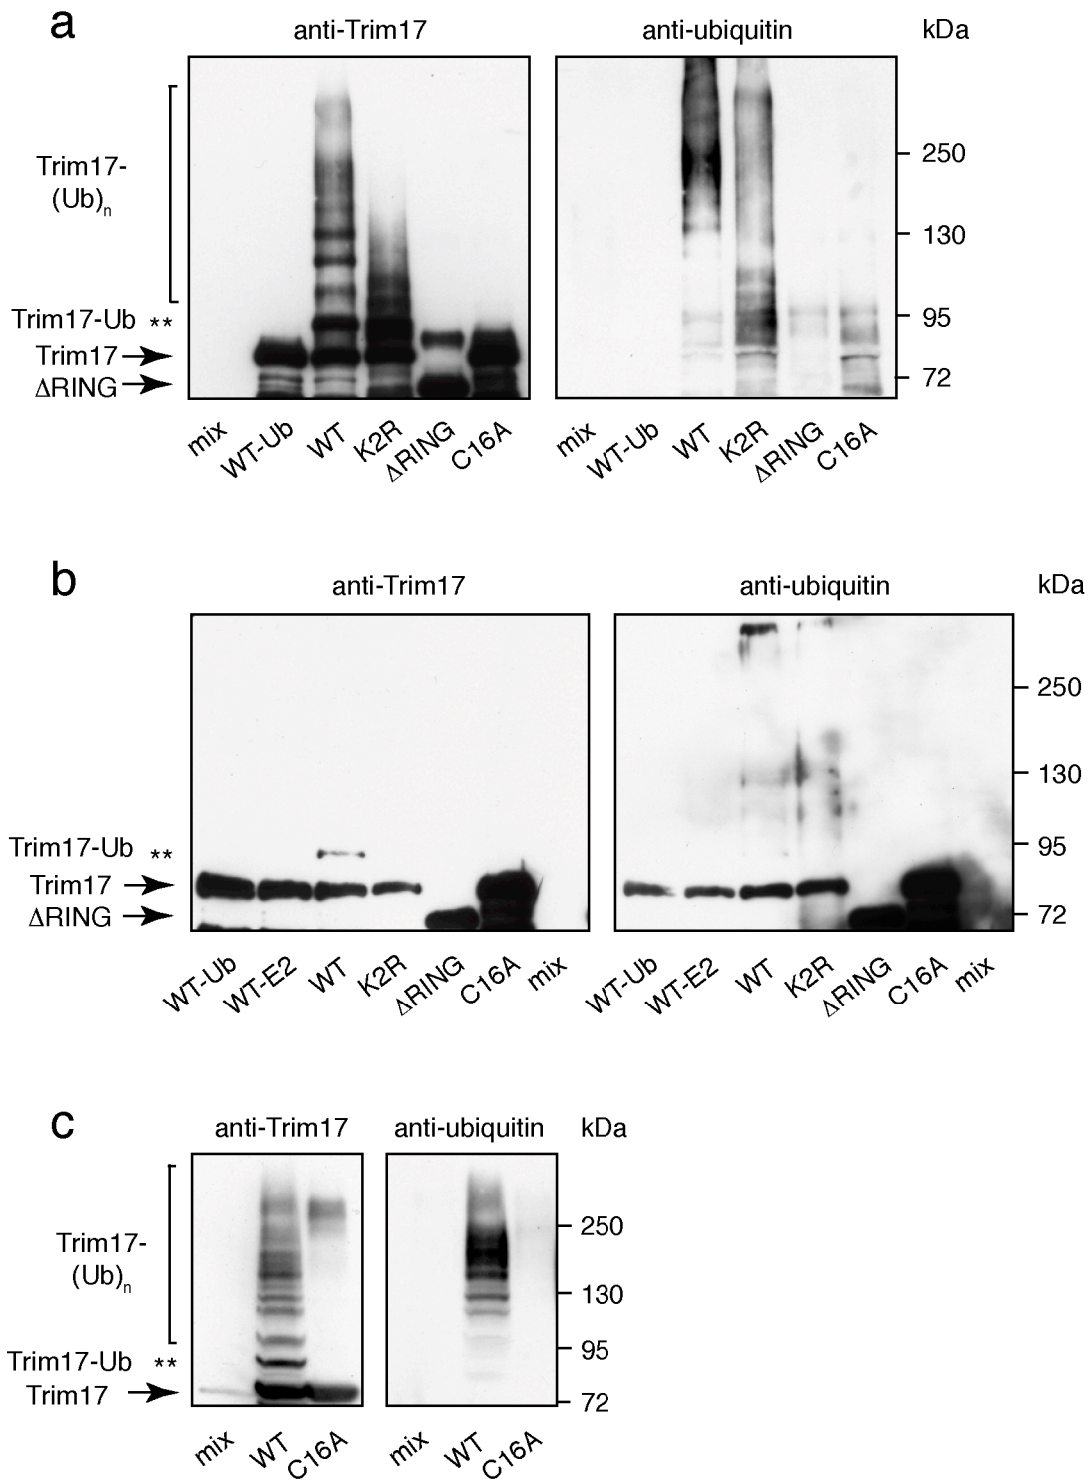

Figure S2

Supplement: NIHMS30631-supplement-3.pdf [file NIHMS30631-supplement-3.pdf]

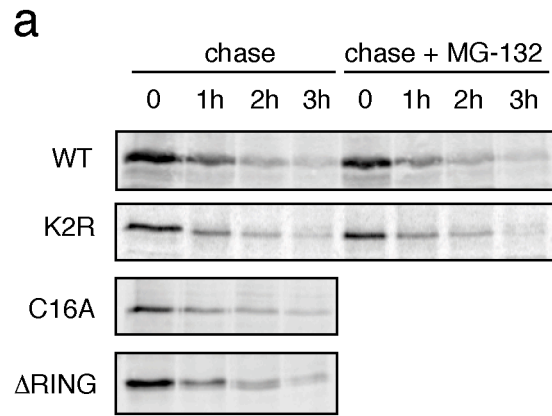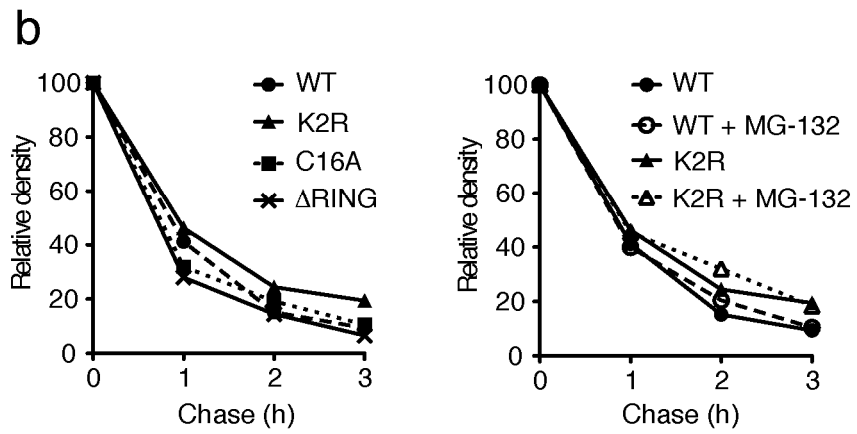

Figure S3

Supplement: NIHMS30631-supplement-4.pdf [file NIHMS30631-supplement-4.pdf]
